# Supplementary material
Source: PubMed Central journal article supplement (PMC5495112)
Supplement: NIHMS870112-supplement-Table_S1.pdf [file NIHMS870112-supplement-Table_S1.pdf]

**Table S1. Oligonucleotide sequences**

| Oligo Name         | Sequence (5'-3')          |
|--------------------|---------------------------|
| miNOS-F            | CAGAGGACCCAGAGACAAGC      |
| miNOS-B            | GGCAGCACATCAAAGCGGC       |
| mIRF8-F            | GAAGACCCATTCCTGGCATCTC    |
| mIRF8-B            | CAAACCTAATCCTTTTCAGCGGC   |
| mMll1-F            | CCAAAAAGCAACAGGGCG        |
| mMll1-B            | TAGATGAAGGAGCGGAAAGGC     |
| mMll2-F            | CCTGATGGTTTTGATGTTCTTCGG  |
| mMll2-B            | GGGAGTTGATTCTGATGGAGCC    |
| mMll3-F            | TACATCAACCACTCCTGTGCCC    |
| mMll3-B            | TGACACGGAATCTTGTGCTGG     |
| mSetd1a-F          | GCCTTTCTCCCTTTTCCACCTC    |
| mSetd1a-B          | CCTTGCTTTCTGCTATCTCTGCTTC |
| mSetd1b-F          | CACAGTAACAGCAAGTCCCATCC   |
| mSetd1b-B          | AACCACAACAAAACCACCAACG    |
| miNOSChIP1-F       | AAAGGAGAAACAGCCACCAAGC    |
| miNOSChIP1-B       | AGCACCCACAACCCAAAGAAC     |
| miNOSChIP2-F       | TTTCCCAGGTTACCCAGCATC     |
| miNOSChIP2-B       | CACACACACACACACACACCAGTC  |
| miNOSChIP3-F       | CAGCACAGCCCATCCACTATTC    |
| miNOSChIP3-B       | GGACACATTCATCAGGAGGTTTTC  |
| miNOSChIP4-F       | ACTCAGGGTAGGGTCCAGTTCATC  |
| miNOSChIP4-B       | TATGTGGCTTCTCCTTGGCGAG    |
| m $\beta$ -actin-F | ATTGTTACCAACTGGGACGACATG  |
| m $\beta$ -actin-B | CTTCATGAGGTAGTCTGTCAGGTC  |
